# Supplementary material for: Redressing the balance: quantifying net intercatchment groundwater flows
Source: Copernicus journal article supplement (doi:10.5194/hess-22-6415-2018), 2018-12-10
Supplement: Supplementary file [file hess-22-6415-2018-supplement.pdf]

Supplement of Hydrol. Earth Syst. Sci., 22, 6415–6434, 2018  
<https://doi.org/10.5194/hess-22-6415-2018-supplement>  
© Author(s) 2018. This work is distributed under  
the Creative Commons Attribution 4.0 License.

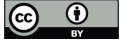

*Supplement of*

## **Redressing the balance: quantifying net intercatchment groundwater flows**

**Laurène Bouaziz et al.**

*Correspondence to:* Laurène Bouaziz (laurene.bouaziz@deltares.nl)

The copyright of individual parts of the supplement might differ from the CC BY 4.0 License.

The supplement provides details on the water balance equations, constitutive functions and the model parameters (including prior and posterior distributions). Additionally, the supplement contains an analysis of the inter-annual variability of net intercatchment groundwater flow processes.

|                                                                            |           |
|----------------------------------------------------------------------------|-----------|
| <b>S1 Model equations</b>                                                  | <b>s2</b> |
| <b>S2 Prior and posterior parameter distributions</b>                      | <b>s5</b> |
| <b>S3 Inter-annual variability of net intercatchment groundwater flows</b> | <b>s7</b> |

## S1 Model equations

Symbols used to define the different fluxes and stores in the model schematizations (see Figure 4 of the paper) are detailed in Table S1 and Table S2, definitions of the symbols used for the parameters are provided in Section S2 of the Supplement. Water balance and constitutive equations of the zero, constant, preferential and overflow intercatchment groundwater flows models are provided in Table S3 and in Table S4.

Table S1: Definitions of the symbols used to denote the different fluxes in the models.

| Fluxes (mm hr <sup>-1</sup> ) | Definition                                               |
|-------------------------------|----------------------------------------------------------|
| $p$                           | Precipitation                                            |
| $e_I$                         | Evaporation from interception                            |
| $e_U$                         | Evaporation from the root zone storage                   |
| $r_{IU}$                      | Effective precipitation                                  |
| $r_{US}$                      | Recharge to the slow reservoir                           |
| $r_{UF}$                      | Recharge to the fast reservoir                           |
| $r_P$                         | Percolation                                              |
| $q_F$                         | Fast runoff                                              |
| $q_S$                         | Slow runoff                                              |
| $q_{River}$                   | Discharge which ends up in the river                     |
| $q_{IGF,constant}$            | Net constant intercatchment groundwater flows            |
| $q_{IGF,pref.}$               | Net preferential intercatchment groundwater flows        |
| $q_{IGF}$                     | Net intercatchment groundwater flows from overflow model |

Table S2: Definitions of the symbols used to denote the different stores in the models.

| Stores (mm) | Definition           |
|-------------|----------------------|
| $S_I$       | Interception storage |
| $S_U$       | Root zone storage    |
| $S_F$       | Fast reservoir store |
| $S_S$       | Slow reservoir store |

Table S3: Water balance equations. The ✓ indicates for which model(s) the water balance equations apply.

| Water balance equation                                   | Zero | Constant | Preferential | Overflow |
|----------------------------------------------------------|------|----------|--------------|----------|
| $\frac{dS_I}{dt} = p - e_I - r_{IU}$                     | ✓    | ✓        | ✓            | ✓        |
| $\frac{dS_U}{dt} = r_{IU} - e_U - r_P - r_{US} - r_{UF}$ | ✓    | ✓        | ✓            |          |
| $\frac{dS_U}{dt} = r_{IU} - e_U - r_{US}$                |      |          |              | ✓        |
| $\frac{dS_F}{dt} = r_{UF} - q_F$                         | ✓    | ✓        | ✓            |          |
| $\frac{dS_F}{dt} = r_{SF} - q_{River}$                   |      |          |              | ✓        |
| $\frac{dS_S}{dt} = r_{US} + r_P - q_S$                   | ✓    |          | ✓            |          |
| $\frac{dS_S}{dt} = r_{US} + r_P - q_S - q_{IGF}$         |      | ✓        |              |          |
| $\frac{dS_S}{dt} = r_{US} - r_{SF} - q_{IGF}$            |      |          |              | ✓        |
| $q_{River} = q_S + q_F$                                  | ✓    | ✓        | ✓            |          |
| $q_{Tot} = q_{River} + q_{IGF}$                          | ✓    | ✓        | ✓            | ✓        |

Table S4: Constitutive functions. The  $\checkmark$  indicates for which model(s) the constitutive functions apply. The following values are fixed for the smoothing parameters  $m_1 = m_2 = m_4 = 0.005$  and  $m_3 = 0.05$  ( $\sigma$  value of the error function).

| Constitutive functions                                                                     | Zero         | Constant     | Preferential | Overflow     |
|--------------------------------------------------------------------------------------------|--------------|--------------|--------------|--------------|
| $\overline{S_I} = \frac{S_I}{I_{max}}$                                                     | $\checkmark$ | $\checkmark$ | $\checkmark$ | $\checkmark$ |
| $\overline{S_U} = \frac{S_U}{S_{U,max}}$                                                   | $\checkmark$ | $\checkmark$ | $\checkmark$ | $\checkmark$ |
| $\overline{S_S} = \frac{S_S}{S_{S,max}}$                                                   |              |              |              | $\checkmark$ |
| $e_I = e_P \cdot \frac{S_I \cdot (1+m_1)}{\overline{S_I} + m_1}$                           | $\checkmark$ | $\checkmark$ | $\checkmark$ | $\checkmark$ |
| $r_{IU} = p \cdot \left(1 - \frac{(1-\overline{S_I})(1+m_2)}{1-\overline{S_I}+m_2}\right)$ | $\checkmark$ | $\checkmark$ | $\checkmark$ | $\checkmark$ |
| $e_U = (e_P - e_I) \cdot \frac{S_U}{L_p}$                                                  | $\checkmark$ | $\checkmark$ | $\checkmark$ | $\checkmark$ |
| $r_U = r_{US} + r_{UF}$                                                                    | $\checkmark$ | $\checkmark$ | $\checkmark$ |              |
| $r_U = p \cdot \overline{S_U}^\beta$                                                       | $\checkmark$ | $\checkmark$ | $\checkmark$ |              |
| $r_{US} = r_U \cdot d$                                                                     | $\checkmark$ | $\checkmark$ | $\checkmark$ |              |
| $r_{UF} = r_U \cdot (1 - d)$                                                               | $\checkmark$ | $\checkmark$ | $\checkmark$ |              |
| $r_P = p_{max} \cdot \overline{S_U}$                                                       | $\checkmark$ | $\checkmark$ | $\checkmark$ |              |
| $q_F = k_F^{-1} \cdot S_F^\alpha$                                                          | $\checkmark$ | $\checkmark$ | $\checkmark$ |              |
| $q_S = k_S^{-1} \cdot S_S$                                                                 | $\checkmark$ | $\checkmark$ | $\checkmark$ |              |
| $q_{IGF} = c_{IGF}$                                                                        |              | $\checkmark$ |              |              |
| $q_{IGF} = erf(r_{US}, \mu, m_3) \cdot p_{erc} \cdot r_{US}$                               |              |              | $\checkmark$ |              |
| $q_{IGF} = k_{IGF}^{-1} \cdot S_S$                                                         |              |              |              | $\checkmark$ |
| $r_{US} = p \cdot \overline{S_U}^\beta$                                                    |              |              |              | $\checkmark$ |
| $r_{SF} = r_{US} \cdot \frac{\overline{S_S} \cdot (1+m_4)}{S_S + m_4}$                     |              |              |              | $\checkmark$ |
| $q_{River} = k_{River}^{-1} \cdot S_F$                                                     |              |              |              | $\checkmark$ |

## S2 Prior and posterior parameter distributions

A description of model parameters, units and prior range is provided in Table S5. Posterior parameter ranges for the zero, constant and preferential models are given in Table S6. For the Aroffe catchment, the posterior parameter distributions of the overflow model are shown in Table S7.

Table S5: Model parameters, units and prior range (\*MRC denotes the value determined with a master recession curve  $\pm 10$  days). The  $\checkmark$  indicates for which model(s) the parameters apply.

| Parameter   | unit               | Definition                                                   | Range        | Zero         | Constant     | Preferential | Overflow     |
|-------------|--------------------|--------------------------------------------------------------|--------------|--------------|--------------|--------------|--------------|
| $I_{max}$   | mm                 | Maximum interception capacity                                | 1 - 3        | $\checkmark$ | $\checkmark$ | $\checkmark$ | $\checkmark$ |
| $S_{U,max}$ | mm                 | Root zone storage capacity                                   | 50 - 350     | $\checkmark$ | $\checkmark$ | $\checkmark$ | $\checkmark$ |
| $\beta$     | -                  | Shape parameter of storage capacity distribution             | 1 - 5        | $\checkmark$ | $\checkmark$ | $\checkmark$ | $\checkmark$ |
| $L_p$       | -                  | Reduction parameter for potential evaporation                | 0 - 1        | $\checkmark$ | $\checkmark$ | $\checkmark$ | $\checkmark$ |
| $k_F$       | h                  | Characteristic time scale of the fast recession              | 2 - 960      | $\checkmark$ | $\checkmark$ | $\checkmark$ |              |
| $k_S$       | h                  | Characteristic time scale of the slow recession              | MRC*         | $\checkmark$ | $\checkmark$ | $\checkmark$ |              |
| $T_F$       | h                  | Time lag                                                     | 1 - 20       | $\checkmark$ | $\checkmark$ | $\checkmark$ |              |
| $d$         | -                  | Fraction to slow reservoir                                   | 0 - 1        | $\checkmark$ | $\checkmark$ | $\checkmark$ |              |
| $p_{max}$   | mm h <sup>-1</sup> | Maximum percolation rate                                     | 0 - 0.05     | $\checkmark$ | $\checkmark$ | $\checkmark$ |              |
| $\alpha$    | -                  | Non linear coefficient of the fast reservoir                 | 1 - 2        | $\checkmark$ | $\checkmark$ | $\checkmark$ |              |
| $c_{IGF}$   | mm h <sup>-1</sup> | Constant net intercatchment groundwater flow ( $IGF_{net}$ ) | -0.01 - 0.02 |              | $\checkmark$ |              |              |
| $\mu$       | mm h <sup>-1</sup> | Threshold of the recharge above which $IGF_{net}$ occurs     | 0.005 - 0.9  |              |              | $\checkmark$ |              |
| $p_{erc}$   | -                  | Fraction of the recharge to $IGF_{net}$                      | -0.5 - 1     |              |              | $\checkmark$ |              |
| $k_{IGF}$   | h                  | Characteristic time scale of the $IGF_{net}$                 | 5 - 600      |              |              |              | $\checkmark$ |
| $k_{River}$ | h                  | Characteristic time scale of the river flow                  | 5 - 600      |              |              |              | $\checkmark$ |
| $S_{S,max}$ | mm                 | Maximum capacity of underground stores                       | 1 - 60       |              |              |              | $\checkmark$ |
| $d_{IGF}$   | -                  | Fraction to $IGF_{net}$ reservoir                            | 0.5 - 1      |              |              |              | $\checkmark$ |

Table S6: Posterior parameter range (5-95 percentiles) for the zero, constant and preferential models for a selection of parameters

| Parameter               | $S_{u,max}$ | $L_p$     | $k_F$     | $d$         | $p_{max}$          | $\alpha$  | $C_{IGF}$          | $p_{perc}$ |
|-------------------------|-------------|-----------|-----------|-------------|--------------------|-----------|--------------------|------------|
| Unit                    | mm          | -         | h         | -           | mm h <sup>-1</sup> |           | mm h <sup>-1</sup> | -          |
| Prior                   | 50 - 350    | 0 - 1     | 2 - 960   | 0 - 1       | 0 - 0.05           | 1 - 2     | -0.01 - 0.02       | -0.5 - 1   |
| Sainte-Marie - Zero     | 224 - 324   | 0.1 - 0.5 | 108 - 908 | 0.02 - 0.16 | 0.007 - 0.020      | 1.5 - 2.0 |                    |            |
| Sainte-Marie - Constant | 220 - 309   | 0.5 - 0.9 | 83 - 747  | 0.00 - 0.15 | 0.016 - 0.038      | 1.3 - 2.0 | 0.004 - 0.016      |            |
| Sainte-Marie - Pref.    | 64 - 273    | 0.0 - 0.8 | 68 - 542  | 0.17 - 0.42 | 0.003 - 0.020      | 1.1 - 1.9 |                    | 0.7 - 1.0  |
| Straimont - Zero        | 162 - 226   | 0.1 - 0.5 | 316 - 904 | 0.07 - 0.18 | 0.001 - 0.013      | 1.2 - 1.6 |                    |            |
| Straimont - Constant    | 102 - 292   | 0.0 - 0.9 | 234 - 934 | 0.06 - 0.20 | 0.001 - 0.020      | 1.1 - 1.5 | -0.003 - 0.006     |            |
| Straimont - Pref.       | 152 - 291   | 0.1 - 0.7 | 258 - 886 | 0.03 - 0.16 | 0.001 - 0.010      | 1.1 - 1.5 |                    | -0.3 - 0.6 |
| Tintigny - Zero         | 144 - 318   | 0.3 - 0.8 | 177 - 931 | 0.02 - 0.12 | 0.002 - 0.012      | 1.2 - 1.6 |                    |            |
| Tintigny - Constant     | 125 - 248   | 0.3 - 0.8 | 151 - 896 | 0.02 - 0.13 | 0.002 - 0.028      | 1.2 - 1.7 | -0.004 - 0.008     |            |
| Tintigny - Pref.        | 152 - 303   | 0.4 - 0.8 | 108 - 876 | 0.03 - 0.20 | 0.001 - 0.011      | 1.1 - 1.6 |                    | -0.4 - 0.9 |
| Chiny - Zero            | 166 - 283   | 0.2 - 0.8 | 203 - 948 | 0.01 - 0.14 | 0.003 - 0.016      | 1.2 - 1.6 |                    |            |
| Chiny - Constant        | 140 - 314   | 0.0 - 0.8 | 182 - 901 | 0.01 - 0.13 | 0.003 - 0.025      | 1.1 - 1.6 | -0.002 - 0.008     |            |
| Chiny - Pref.           | 111 - 268   | 0.2 - 0.7 | 122 - 865 | 0.03 - 0.18 | 0.004 - 0.016      | 1.1 - 1.6 |                    | -0.4 - 0.9 |
| Membre-Pont - Zero      | 114 - 232   | 0.1 - 0.6 | 307 - 884 | 0.01 - 0.16 | 0.004 - 0.022      | 1.2 - 1.5 |                    |            |
| Membre-Pont - Constant  | 107 - 237   | 0.0 - 0.7 | 258 - 922 | 0.01 - 0.14 | 0.002 - 0.031      | 1.2 - 1.5 | -0.005 - 0.003     |            |
| Membre-Pont - Pref.     | 129 - 260   | 0.1 - 0.7 | 195 - 919 | 0.02 - 0.15 | 0.004 - 0.020      | 1.1 - 1.5 |                    | -0.4 - 0.9 |
| Huccorgne Pref.         | 146 - 316   | 0.3 - 0.8 | 86 - 837  | 0.07 - 0.52 | 0.006 - 0.015      | 1.3 - 1.8 |                    | -0.5 - 1.0 |
| Yvoir Pref.             | 110 - 250   | 0.4 - 0.9 | 179 - 908 | 0.39 - 0.65 | 0.009 - 0.024      | 1.4 - 1.9 |                    | 0.7 - 0.9  |
| Sormonne Pref.          | 119 - 299   | 0.0 - 0.8 | 70 - 818  | 0.41 - 0.58 | 0.000 - 0.017      | 1.3 - 2.0 |                    | 0.6 - 1.0  |
| Crusnes Pref.           | 112 - 295   | 0.2 - 0.7 | 271 - 782 | 0.36 - 0.58 | 0.001 - 0.017      | 1.0 - 1.4 |                    | 0.4 - 0.9  |

Table S7: Posterior parameter range (5-95 percentiles) for overflow model used in the Aroffe catchment at Vannes-le-Châtel

| Parameter         | $I_{max}$ | $S_{u,max}$ | $\beta$   | $L_p$     | $k_{River}$ | $k_{IGF}$     | $S_{S,max}$ | $d_{IGF}$   |
|-------------------|-----------|-------------|-----------|-----------|-------------|---------------|-------------|-------------|
| Unit              | mm        | mm          | -         | -         | h           | h             | mm          | -           |
| Prior             | 1 - 3     | 50 - 350    | 1 - 5     | 0 - 1     | 5 - 600     | 5 - 600       | 1 - 60      | 0.5 - 1     |
| Aroffe - Overflow | 1.0 - 2.9 | 88 - 210    | 2.0 - 4.9 | 0.2 - 0.8 | 87 - 226    | 212.7 - 594.1 | 30.9 - 52.0 | 0.75 - 0.83 |

### S3 Inter-annual variability of net intercatchment groundwater flows

The constant net intercatchment groundwater flow ( $IGF_{net}$ ) model implies the same magnitude of  $IGF_{net}$  each year, while in the preferential model,  $IGF_{net}$  may vary inter-annually depending on meteorological conditions. Although meant for long term averages, the Budyko framework is shown for hydrological years in the Semois catchment at Sainte-Marie in Figure S1. Years with the highest precipitation amounts (2007 and 2012) plot beyond the energy limit, perhaps an indication that certain thresholds are exceeded and that more underground losses towards neighboring catchments occur in these years. Although the observed annual variability may also be caused by changes in storage in the catchment, we consider that there may be years with more  $IGF_{net}$  and we show that the preferential  $IGF_{net}$  model is able to reproduce this behavior. Indeed, modeled mean annual net losses using the preferential model increase as the distance to the energy limit of each hydrological year decreases, as shown in Figure S1.

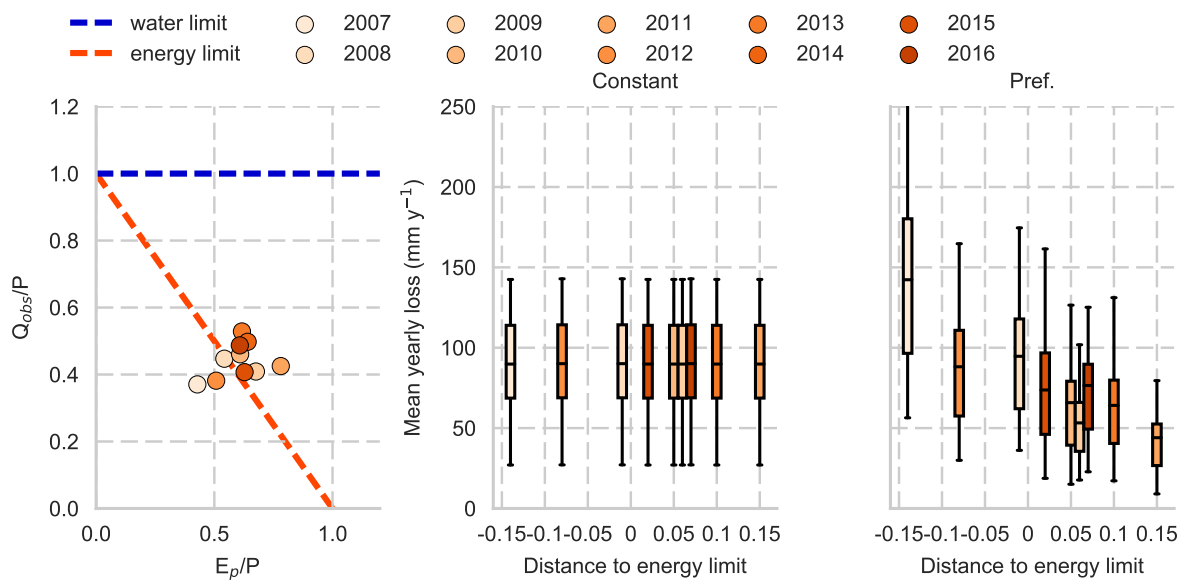

Figure S1: Left: dimensionless representation of the runoff coefficient ( $Q_{obs}/P$ ) as a function of the dryness index ( $E_p/P$ ), referred to as the Budyko framework, for hydrological years in the Semois catchment at Sainte-Marie. The blue line shows the water limit and the red line is the energy limit. Middle: mean annual modeled net loss using the feasible realizations of the constant model as a function of the distance of each year to the energy line. Right: mean annual modeled net loss using the feasible realizations of the preferential model as a function of the distance of each year to the energy line. The relation between the magnitude of the net loss and the distance to the energy limit for each hydrological year shows that the preferential model is able to reproduce the observed inter-annual variability of the water balance by generating higher losses in years that plot beyond or close to the energy limit.
